# Supplementary material for: ZnO/WSe2 vdW heterostructure for photocatalytic water splitting
Source: Royal Society of Chemistry journal article supplement (doi:10.1039/c9tc00573k), 2019-01-01
Supplement: c9tc00573k1.pdf [file c9tc00573k1.pdf]

**Supporting Information for:**

**ZnO/WSe<sub>2</sub> vdW heterostructure for Photocatalytic Water Splitting**

Fafei Hu,<sup>‡ab</sup> Luqi Tao<sup>‡ac</sup>, Huaiyu Ye,<sup>‡ab\*</sup> Xiandong Li,<sup>‡ac</sup> and X.P. Chen<sup>‡abc</sup>

a Key Laboratory of Optoelectronic Technology & Systems, Education Ministry of China, Chongqing University and College of Optoelectronic Engineering, Chongqing University, 400044 Chongqing, China.

b College of Optoelectronic Engineering, Chongqing University, Chongqing 400044, China.

c School of Electrical Engineering, Chongqing University, Chongqing 400044, China.

\*Corresponding author

*E-mail:* [h.ye@tudelft.nl](mailto:h.ye@tudelft.nl)

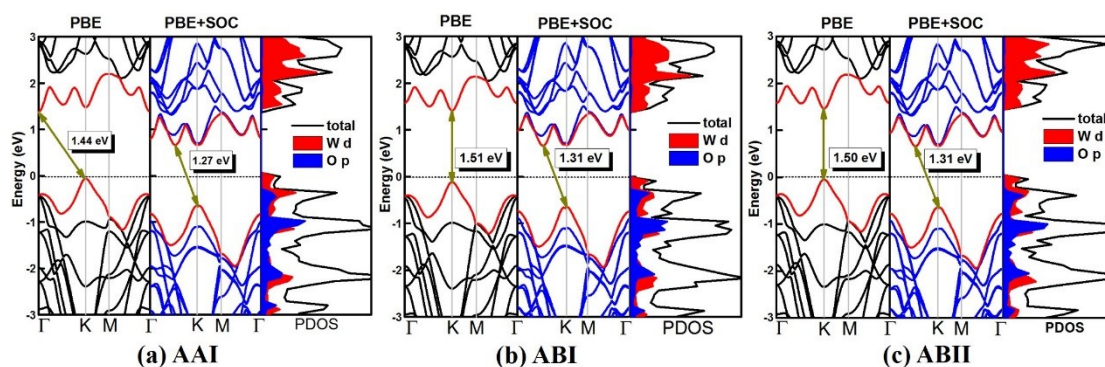

**Fig. S1** (a), (b) and (c) The band gap and PDOS of AAI, ABI and ABII patterns at the PBE level without and with SOC.

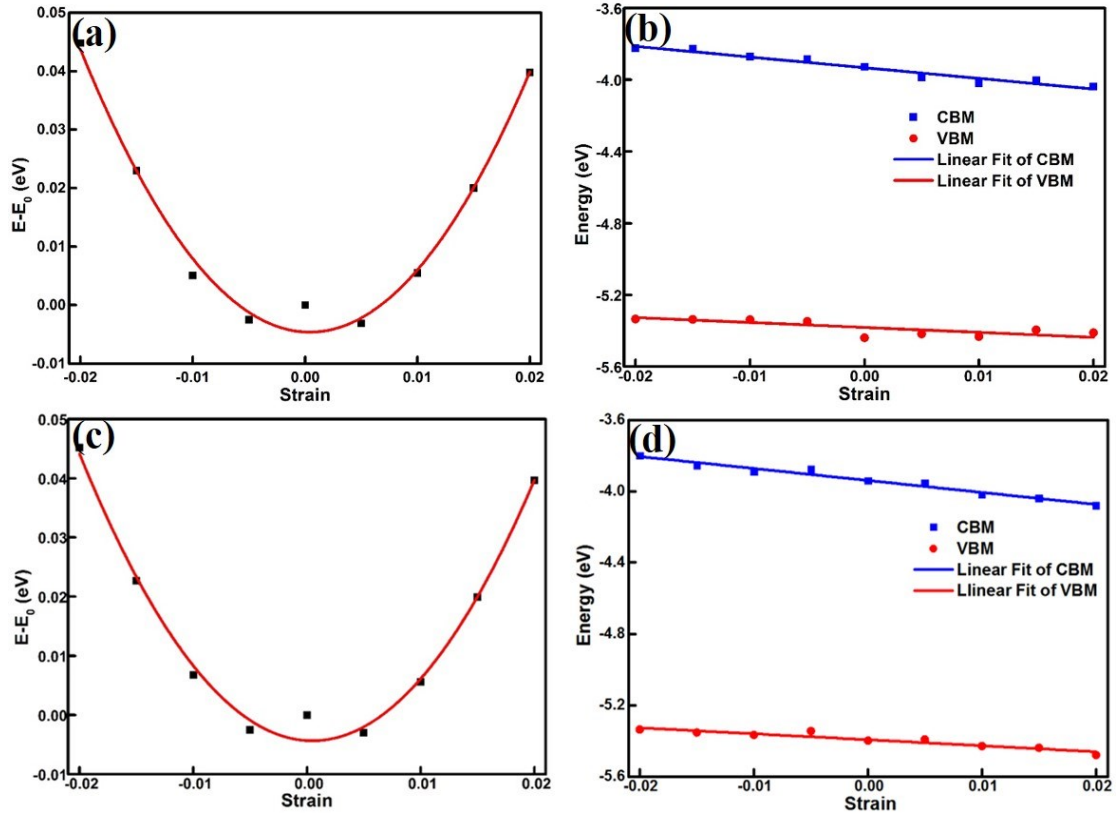

**Fig. S2** Band edge positions and total energy as a function of the uniaxial strain for (a,b) along the armchair ( $x$ ) and (c,d) along the zigzag ( $y$ ) direction.

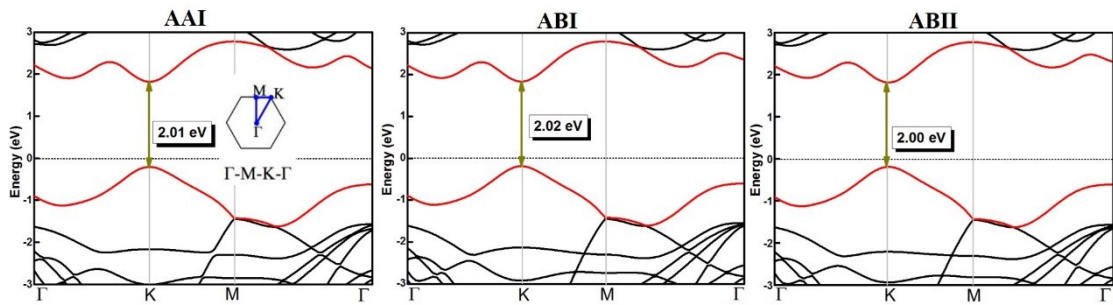

**Fig. S3** The band gaps of patterns AAI, ABI and ABII at the HSE06 level.

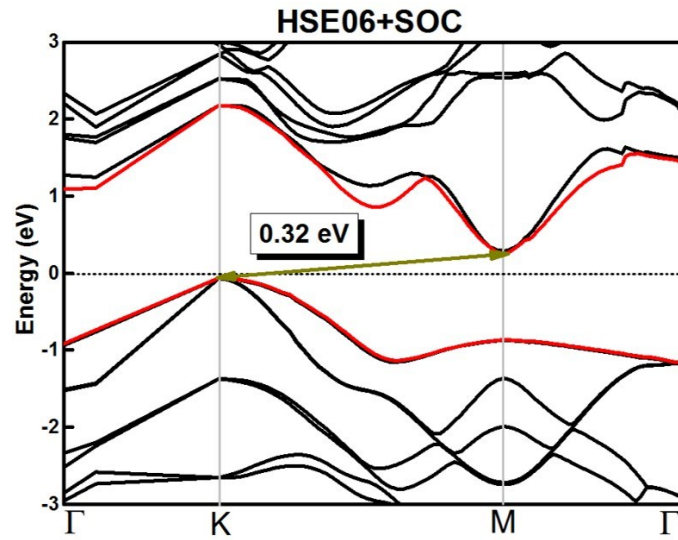

**Fig. S4** The band gap of pattern AAIL at the HSE06 with SOC level.

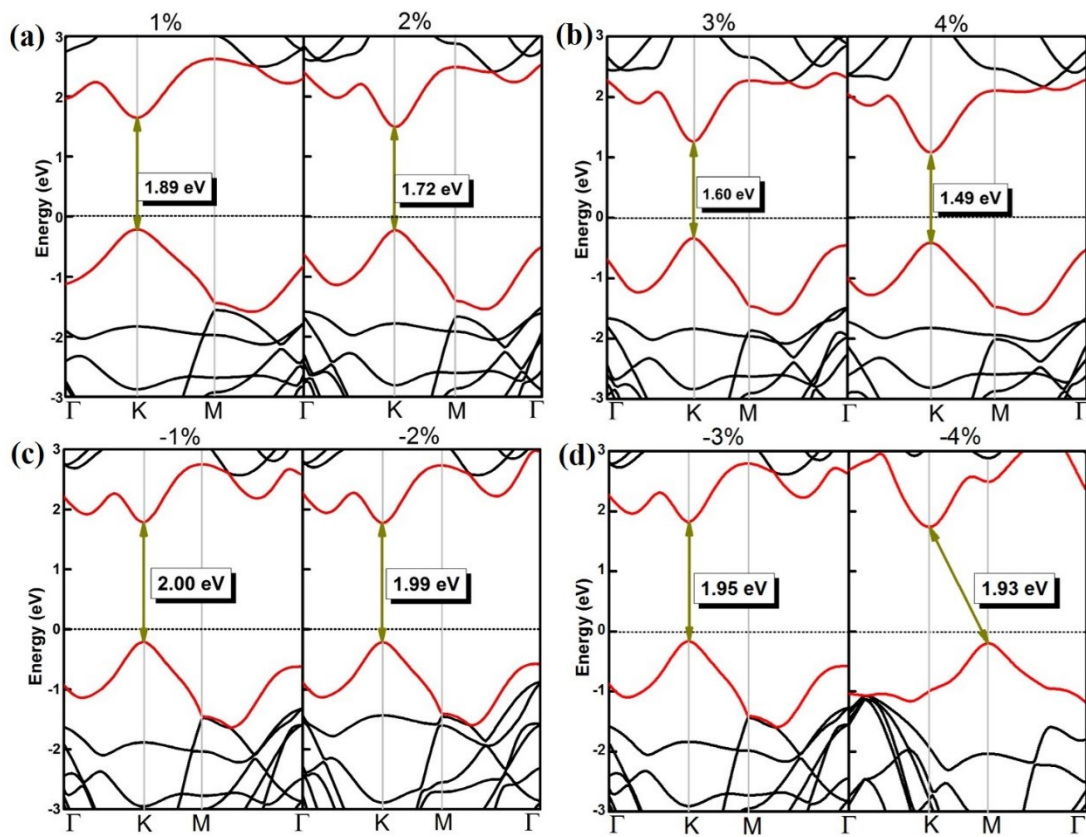

**Fig. S5** Band gaps of ZnO/WSe<sub>2</sub> heterostructure under both biaxial strain of 1% to -4% at the HSE06 level.

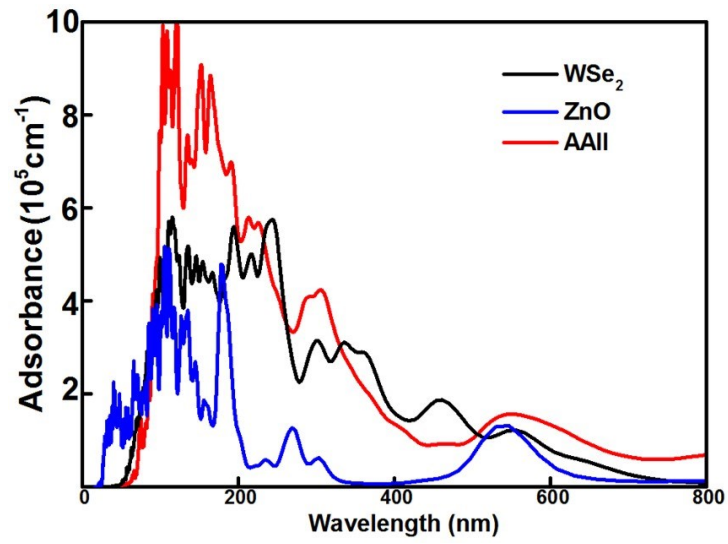

**Fig.S6** Adsorption coefficient of monolayer WSe<sub>2</sub>, ZnO, and their heterostructures at the HSE06 with SOC level.
